# Supplementary material
Source: publisher figshare collection journal article supplement (https://acs.figshare.com/ndownloader/files/16337234)
Supplement: Supplementary file 1 [file 16337234]

---

The supporting information

# **Droplet asymmetric bouncing on inclined superhydrophobic surfaces**

Hao Wang<sup>†</sup>, Cong Liu<sup>†</sup>, Haiyang Zhan, Yahua Liu\*

Key Laboratory for Precision and Non-traditional Machining Technology of Ministry of Education, Dalian University of Technology, Dalian 116024, China

<sup>†</sup>H. W. and C. L. contributed equally to this work.

\*Correspondence should be addressed to Y. L. (E-mail: yahualiu@dlut.edu.cn)

---

### Supplemental figure and figure legends of supplemental information

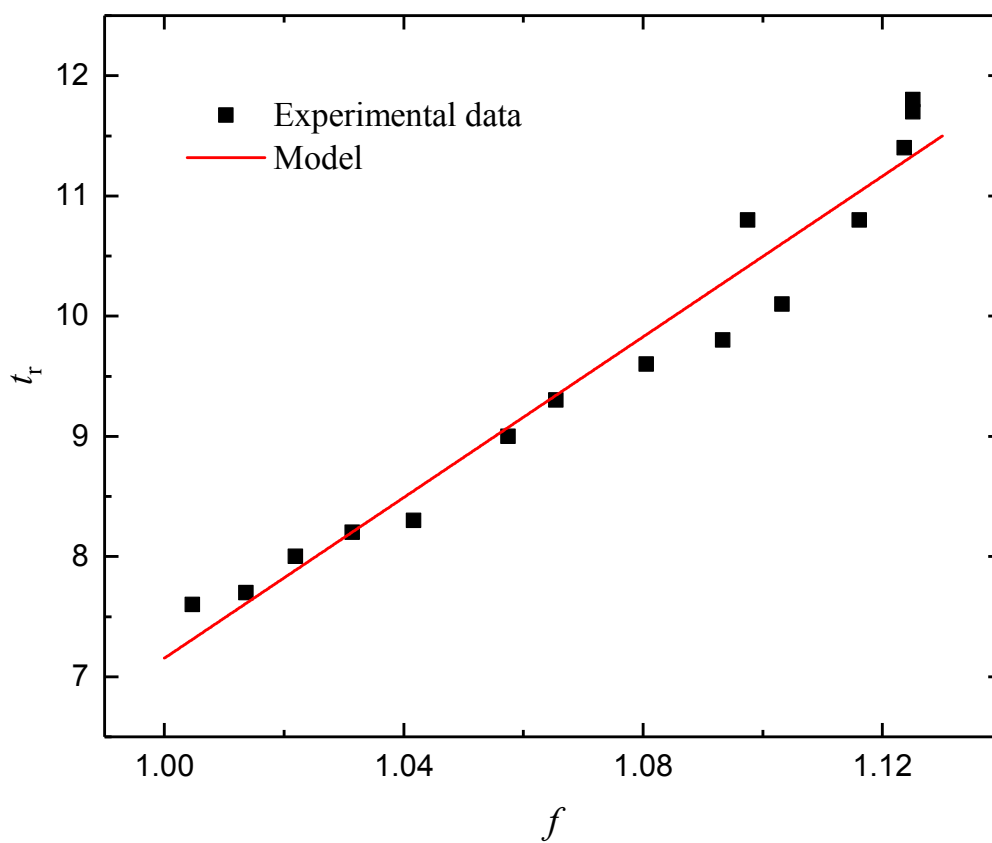

**Supplementary Figure S1. Comparison of the retraction time  $t_r$  as a function of  $f$  between the experimental measurement (black squares) and theoretical prediction (red line). The experimental data shows a good agreement with the model.**
